# Supplementary material for: CREST-VEC: A framework towards more accurate and realistic flood simulation across scales
Source: Copernicus journal article supplement (doi:10.5194/gmd-2022-61), 2022-03-14
Supplement: Supplementary file 1 [file gmd-2022-61-supplement.pdf]

# CREST-VEC: A framework towards more accurate and realistic flood simulation across scales

Zhi Li<sup>1</sup>, Shang Gao<sup>1</sup>, Mengye Chen<sup>1</sup>, Jonathan J. Gourley<sup>2</sup>, Naoki Mizukami<sup>3</sup>, Yang Hong<sup>1</sup>

<sup>1</sup>School of Civil Engineering and Environmental Science, University of Oklahoma, Norman, OK, 70372, USA

<sup>2</sup>NOAA/National Severe Storms Laboratory, Norman, OK, 73072, USA

<sup>3</sup>National Centers for Atmospheric Research, Boulder, CO, 80307, USA

Correspondence to: Yang Hong (yanghong@ou.edu)

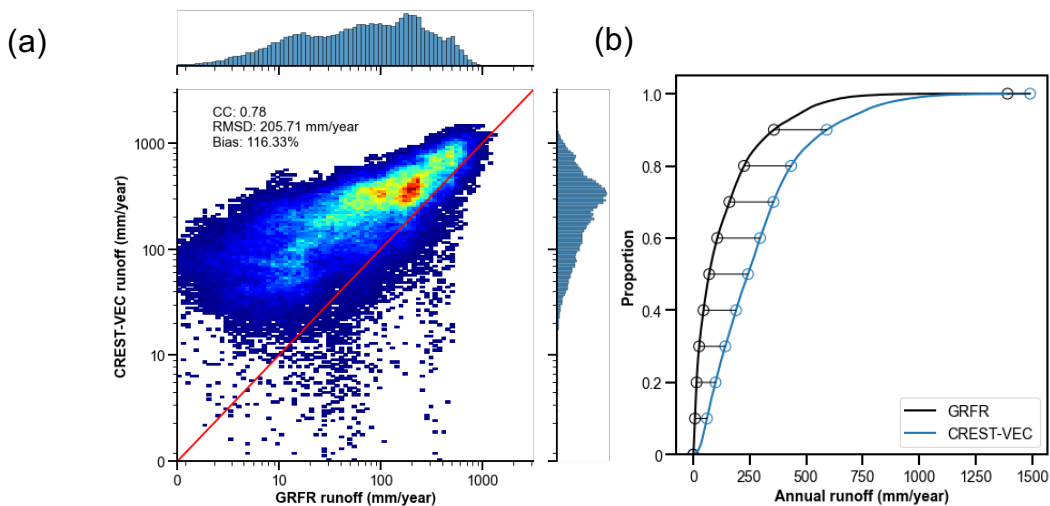

Supplementary Figure 1. (a) density plot of CREST-VEC simulated annual surface runoff against GRFR (Global Reach-level Flood Reanalysis) in the Great Plains; (b) cumulative density function (CDF) of CREST-VEC and GRFR simulated annual runoff.
